# Supplementary material for: Hes4 Controls Proliferative Properties of Neural Stem Cells During Retinal Ontogenesis
Source: PubMed Central journal article supplement (PMC3549485; doi:10.1002/stem.1231), 2012-09-11

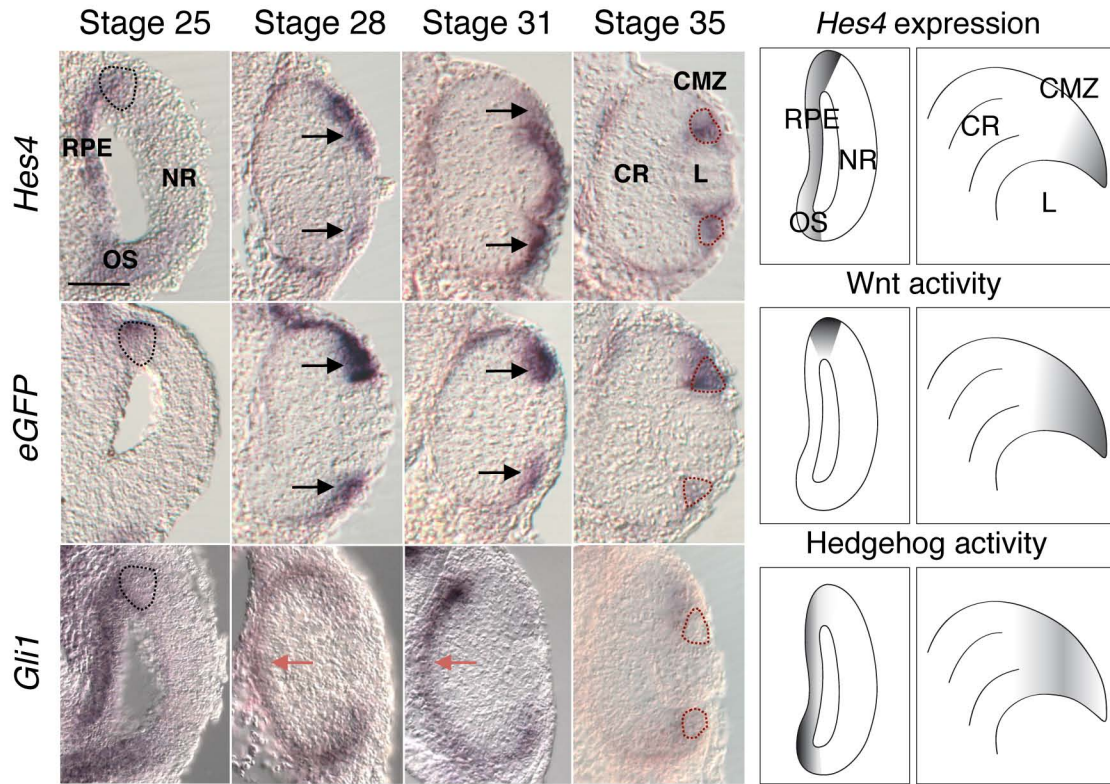

Supplement: stem0030-2784-SD3.pdf [file stem0030-2784-SD3.pdf]
