# Supplementary material for: Hes4 Controls Proliferative Properties of Neural Stem Cells During Retinal Ontogenesis
Source: PubMed Central journal article supplement (PMC3549485; doi:10.1002/stem.1231), 2012-09-11
Supplement: stem0030-2784-SD8.pdf [file stem0030-2784-SD8.pdf]

**Supplementary Table 1. List of antibodies used.**

| <b>Antibody</b>                                                               | <b>Dilution</b> | <b>Manufacturer</b>       |
|-------------------------------------------------------------------------------|-----------------|---------------------------|
| Mouse monoclonal anti-BrdU                                                    | 1:100           | Becton Dickinson          |
| Rabbit polyclonal or mouse monoclonal anti-GFP                                | 1:400           | Molecular Probes          |
| Chicken polyclonal anti-GFP (*)                                               | 1:500           | Aves Labs                 |
| Rabbit polyclonal anti-phospho-Histone H3                                     | 1:500           | Upstate biotechnology     |
| Rabbit polyclonal anti-active caspase 3                                       | 1:500           | BD Pharmingen             |
| Mouse monoclonal anti-syntaxin                                                | 1:500           | Sigma                     |
| Mouse monoclonal anti-RPE XAR1                                                | 1:10            | A gift from Don Sakaguchi |
| Mouse monoclonal anti-calbindin                                               | 1:100           | Swant                     |
| Anti-mouse or anti-rabbit fluorescent secondary antibodies (Alexa 488 or 594) | 1:1000          | Molecular Probes          |

(\*) Antibody used on paraffin-sections following a 10 mn antigen unmasking treatment in boiling Heat-mediated Antigen Retrieval Buffer (10mM sodium citrate, 0.05% Tween 20, pH 6.0)
