# Supplementary material for: Hes4 Controls Proliferative Properties of Neural Stem Cells During Retinal Ontogenesis
Source: PubMed Central journal article supplement (PMC3549485; doi:10.1002/stem.1231), 2012-09-11
Supplement: stem0030-2784-SD9.pdf [file stem0030-2784-SD9.pdf]

**Supplementary Table 2. List of primers used in qPCR experiments.**

| <i>Xenopus laevis</i> qPCR primers |                        |                         |
|------------------------------------|------------------------|-------------------------|
| <b>gene</b>                        | <b>FW primer</b>       | <b>RV primer</b>        |
| <i>Hes4</i>                        | CCCCCTCCAGCCAACAACCA   | GGGGGAGATGGCCTCTGCTG    |
| <i>Patched1</i>                    | CAGCTGCCAGCCGAGGGTA    | GGGCGAAATTGGCATCGCAGTA  |
| <i>CyclinD1</i>                    | CATCCGCAAACACGCCCAGA   | GACACTGCCAGCGGCGATCA    |
| <i>N-Tubulin</i>                   | CCCGTGCCATCCTTGTGGATTT | GCCCAGTTATTGCCAGCACCCTT |
| <i>ODC</i><br>(reference gene)     | GCTTCTGGAGCGGGCAAAGGA  | CCAAGCTCAGCCCCCATGTCA   |
| <i>RPL8</i><br>(reference gene)    | CCACGTGTCCGTGGTGTGGCTA | GCGCAGACGACCAGTACGACGA  |
