# Supplementary material for: Hes4 Controls Proliferative Properties of Neural Stem Cells During Retinal Ontogenesis
Source: Stem Cells. 2012 Sep 11;30(12):2784–95. doi: 10.1002/stem.1231 (PMC3549485; doi:10.1002/stem.1231)
Supplement: Supplementary file 10 [file stem0030-2784-SD10.pdf]

**Supplementary Table 3. Labelling index and cell cycle parameters in the NR and NR/RPE border.**

| <b>A</b>                 |                  | <b>EdU exposure (hrs)</b> |            |            |            |            |            |            |            |
|--------------------------|------------------|---------------------------|------------|------------|------------|------------|------------|------------|------------|
|                          |                  | 0.5                       | 1          | 1.5        | 3          | 6          | 8          | 10         | 12         |
| <b>NR Ctrl</b>           | LI               | 53.80                     | 67.89      | 71.79      | 77.06      | 85.04      | 83.92      | ND         | ND         |
|                          | (% $\pm$ s.e.m.) | $\pm 2.77$                | $\pm 2.04$ | $\pm 1.48$ | $\pm 1.24$ | $\pm 1.80$ | $\pm 0.82$ |            |            |
| <b>Stage 25</b>          | Total cell count | 1927                      | 2108       | 1785       | 3008       | 1948       | 2470       |            |            |
| <b>NR <i>Hes4-GR</i></b> | LI               | 48.65                     | 51.45      | 62.70      | 68.52      | 83.24      | 89.60      | ND         | ND         |
|                          | (% $\pm$ s.e.m.) | $\pm 2.84$                | $\pm 2.04$ | $\pm 1.95$ | $\pm 2.44$ | $\pm 2.52$ | $\pm 4.18$ |            |            |
| <b>Stage 25</b>          | Total cell count | 1394                      | 2153       | 2076       | 2181       | 2457       | 2374       |            |            |
| <b>NR</b>                | LI               | ND                        | 65.60      | 73.93      | 82.95      | 89.11      | 94.81      | 86.04      | 97.03      |
|                          | (% $\pm$ s.e.m.) |                           | $\pm 1.96$ | $\pm 1.16$ | $\pm 1.87$ | $\pm 1.93$ | $\pm 1.10$ | $\pm 1.23$ | $\pm 1.45$ |
| <b>Stage 22</b>          | Total cell count |                           | 1008       | 1318       | 983        | 1698       | 1043       | 1361       | 927        |
| <b>NR/RPE border</b>     | LI               | ND                        | 55.84      | 57.98      | 62.84      | 75.17      | 74.67      | 79.51      | 79.62      |
|                          | (% $\pm$ s.e.m.) |                           | $\pm 3.25$ | $\pm 1.64$ | $\pm 1.95$ | $\pm 2.16$ | $\pm 3.40$ | $\pm 2.55$ | $\pm 2.97$ |
| <b>Stage 22</b>          | Total cell count |                           | 644        | 1057       | 724        | 853        | 387        | 559        | 493        |

  

| <b>B</b>                 |  | <b>Cell-cycle parameters</b>       |                                       |           |                      |                      |                       |                      |
|--------------------------|--|------------------------------------|---------------------------------------|-----------|----------------------|----------------------|-----------------------|----------------------|
|                          |  | <b>T<sub>C</sub>-T<sub>S</sub></b> | <b>GF*T<sub>S</sub>/T<sub>C</sub></b> | <b>GF</b> | <b>T<sub>C</sub></b> | <b>T<sub>S</sub></b> | <b>T<sub>G2</sub></b> | <b>T<sub>M</sub></b> |
| <b>NR Ctrl</b>           |  |                                    |                                       |           |                      |                      |                       |                      |
| <b>Stage 25</b>          |  | 3.62 hrs                           | 0.56                                  | 84.48%    | 10.62 hrs            | 7.00 hrs             | 1.20 hrs              | 0.43 hrs             |
| <b>NR <i>Hes4-GR</i></b> |  |                                    |                                       |           |                      |                      |                       |                      |
| <b>Stage 25</b>          |  | 6.79 hrs                           | 0.48                                  | 89.60%    | 14.73 hrs            | 7.94 hrs             | 1.60 hrs              | 0.25 hrs             |
| <b>NR</b>                |  |                                    |                                       |           |                      |                      |                       |                      |
| <b>Stage 22</b>          |  | 4.00 hrs                           | 0.60                                  | 91.78%    | 11.47 hrs            | 7.47 hrs             | ND                    | ND                   |
| <b>NR/RPE border</b>     |  |                                    |                                       |           |                      |                      |                       |                      |
| <b>Stage 22</b>          |  | 6.69 hrs                           | 0.52                                  | 77.61%    | 20.26 hrs            | 13.57 hrs            | ND                    | ND                   |
